# Supplementary material for: Photoinduced electron-transfer in perylenediimide triphenylamine-based dendrimers: single photon timing and femtosecond transient absorption spectroscopy
Source: Royal Society of Chemistry journal article supplement (doi:10.1039/b718479d), 2008-05-01
Supplement: b718479d.pdf [file b718479d.pdf]

# Photoinduced electron-transfer in perylene-3,4,9,10-tetracarboxylic diimide triphenylamine-based dendrimers: single photon timing and femtosecond transient absorption spectroscopy

Eduard Fron,<sup>a</sup> Roberto Pilot,<sup>a</sup> Gerd Schweitzer,<sup>a</sup> Jianqiang Qu,<sup>b</sup> Andreas Herrmann,<sup>b</sup> Klaus Müllen,<sup>b</sup> Johan Hofkens,<sup>a</sup> Mark Van der Auweraer<sup>a\*</sup> and Frans C. De Schryver<sup>a\*</sup>

<sup>a</sup>Department of Chemistry and Institute of Nanoscale Physics and Chemistry, Katholieke Universiteit Leuven, Celestijnenlaan 200 F, 3001 Heverlee, Belgium;

<sup>b</sup>Max-Planck-Institute for Polymer Research, Ackermannstrasse 10, 55128 Mainz, Germany.

(\*) Corresponding authors

## Supporting Information Available

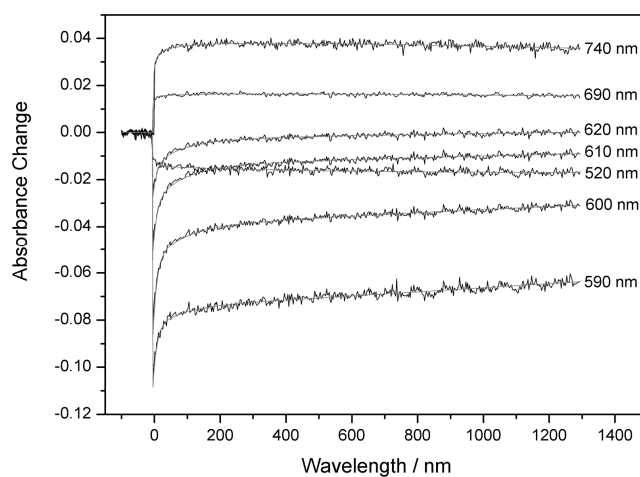

**Fig. 1 SI.** Time-resolved monochromatic transient absorption traces and the corresponding fits of **PDI1N<sub>8</sub>** in toluene recorded in 1400 ps time window at different detection wavelengths as indicated in the figure.

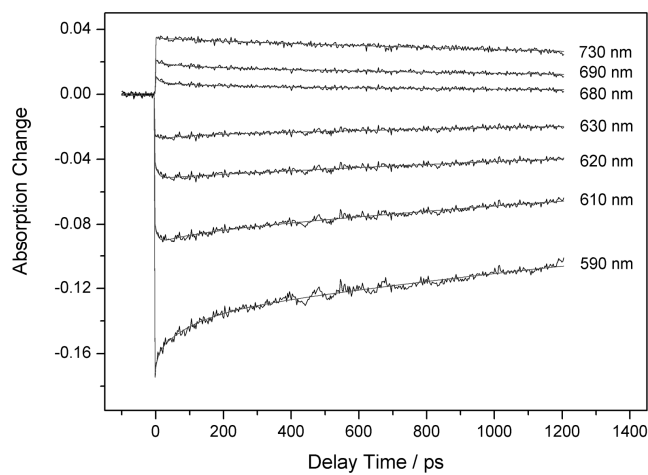

**Fig. 2 SI.** Time-resolved monochromatic transient absorption traces and the corresponding fits of **PDI2N<sub>16</sub>** in toluene recorded in 1400 ps time window at different detection wavelengths as indicated in the figure.
